# Supplementary material
Source: Springer Nature journal article supplement (https://www.springermedizin.de/resource/supplementary/12955_2012_1208_MOESM1_ESM.pdf/9559032)

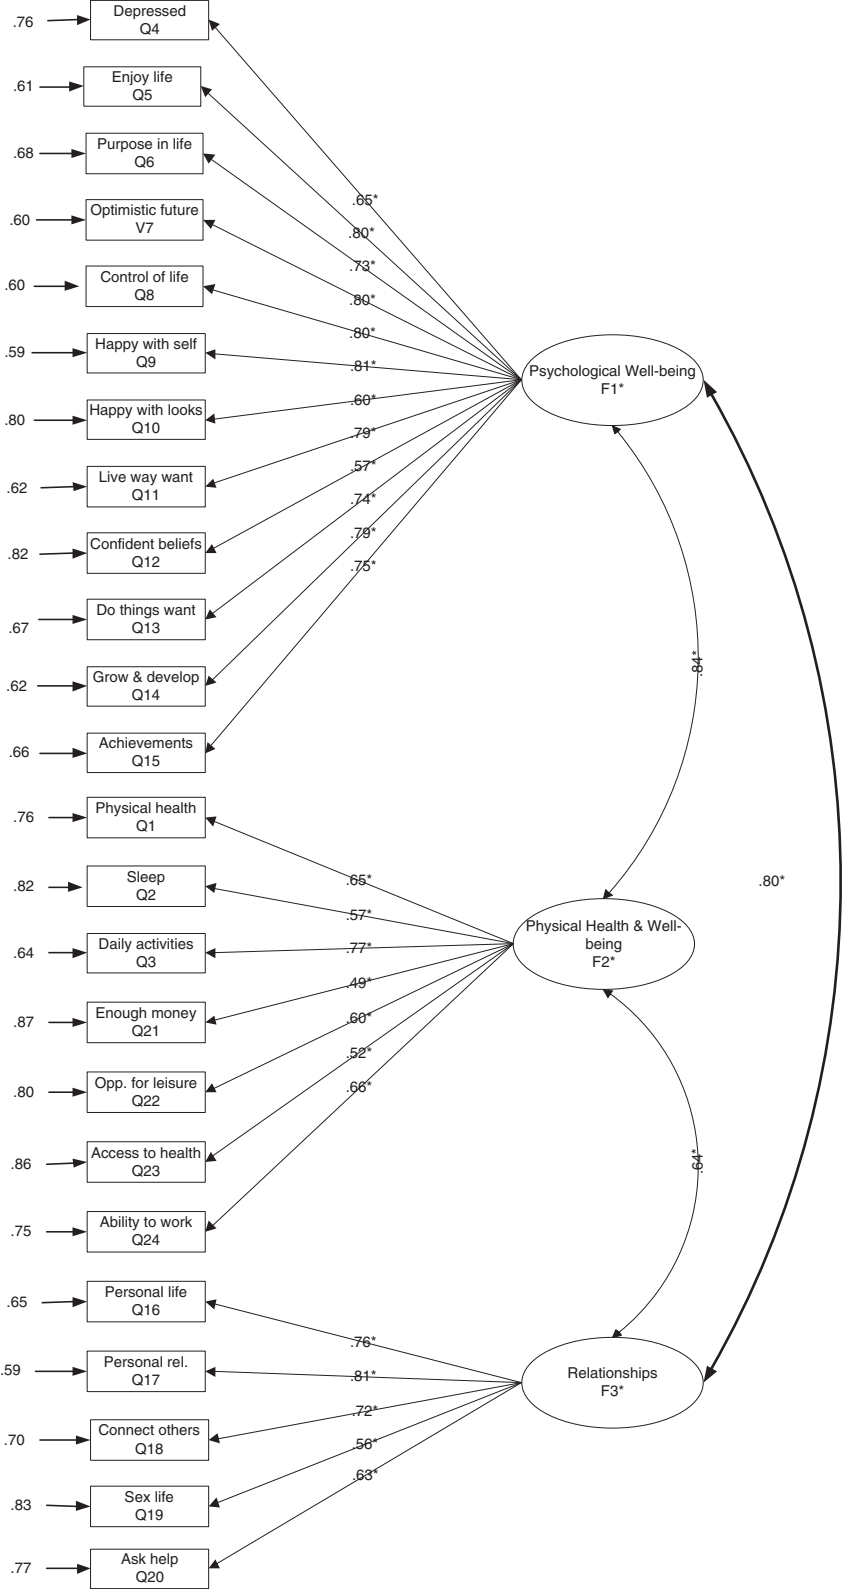

Supplement: MOESM1 [file 9559032]
